# Supplementary material
Source: PubMed Central journal article supplement (PMC10162993)

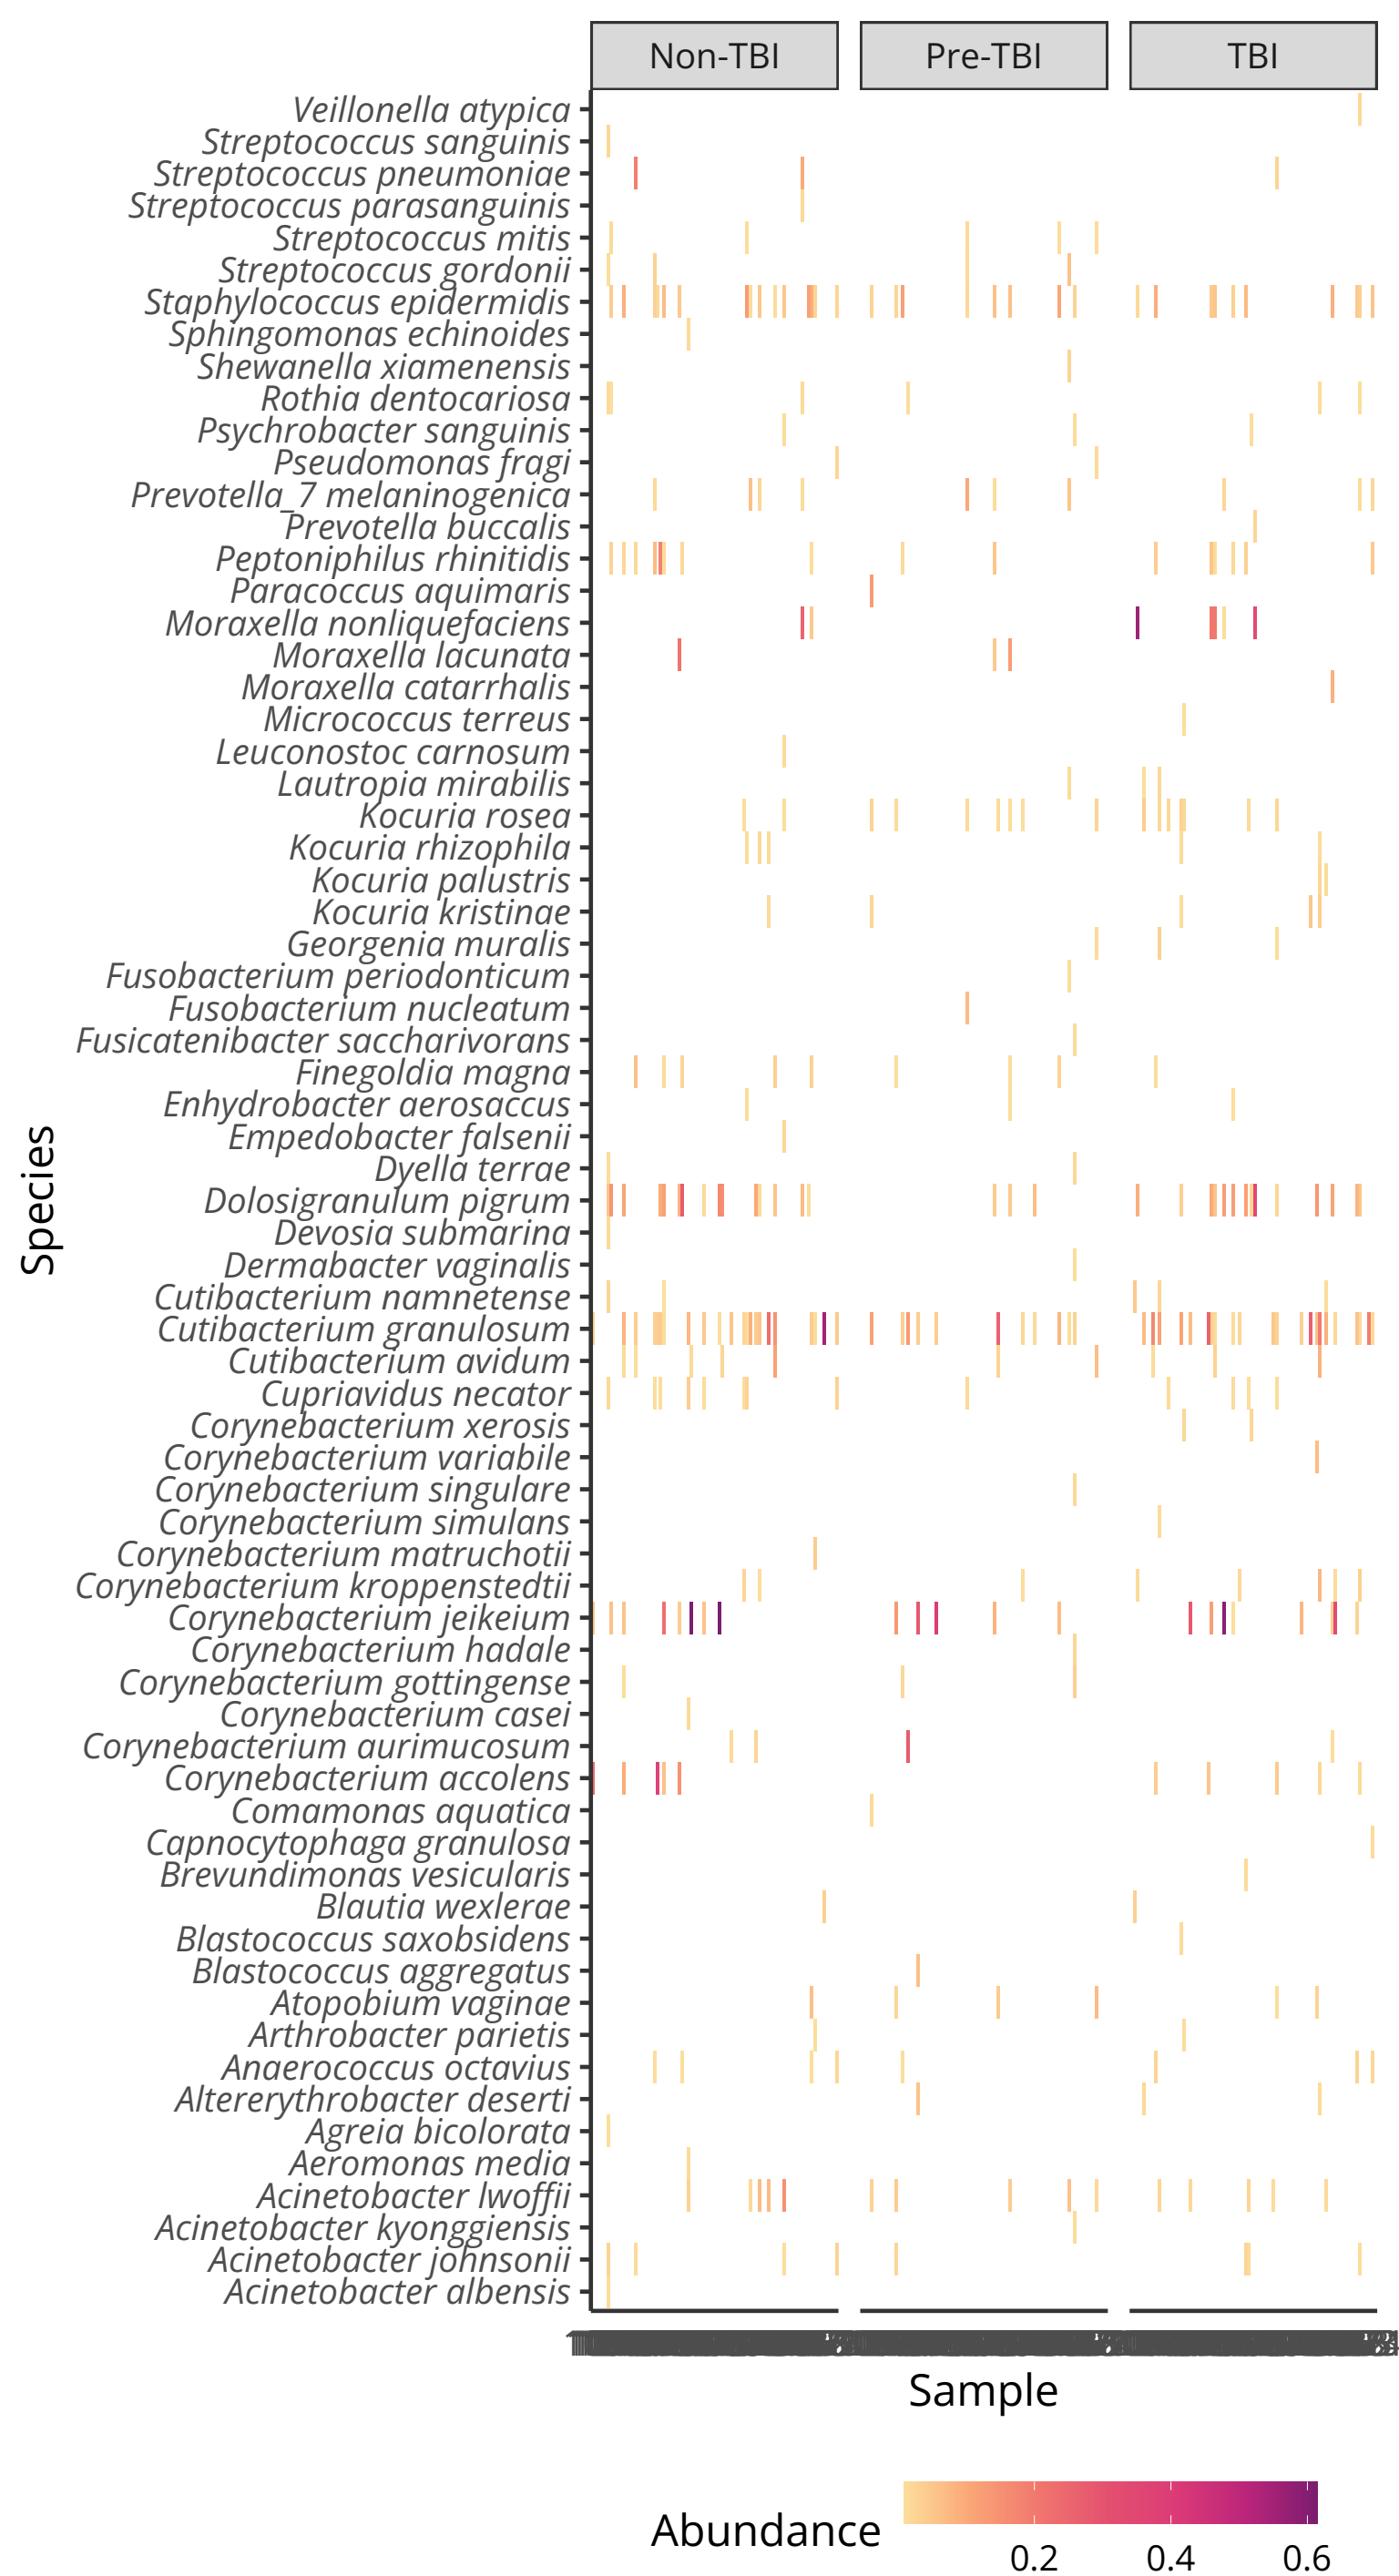

Supplement: 41598_2023_34052_MOESM2_ESM.pdf [file 41598_2023_34052_MOESM2_ESM.pdf]
