# Supplementary material
Source: PubMed Central journal article supplement (PMC10162993)

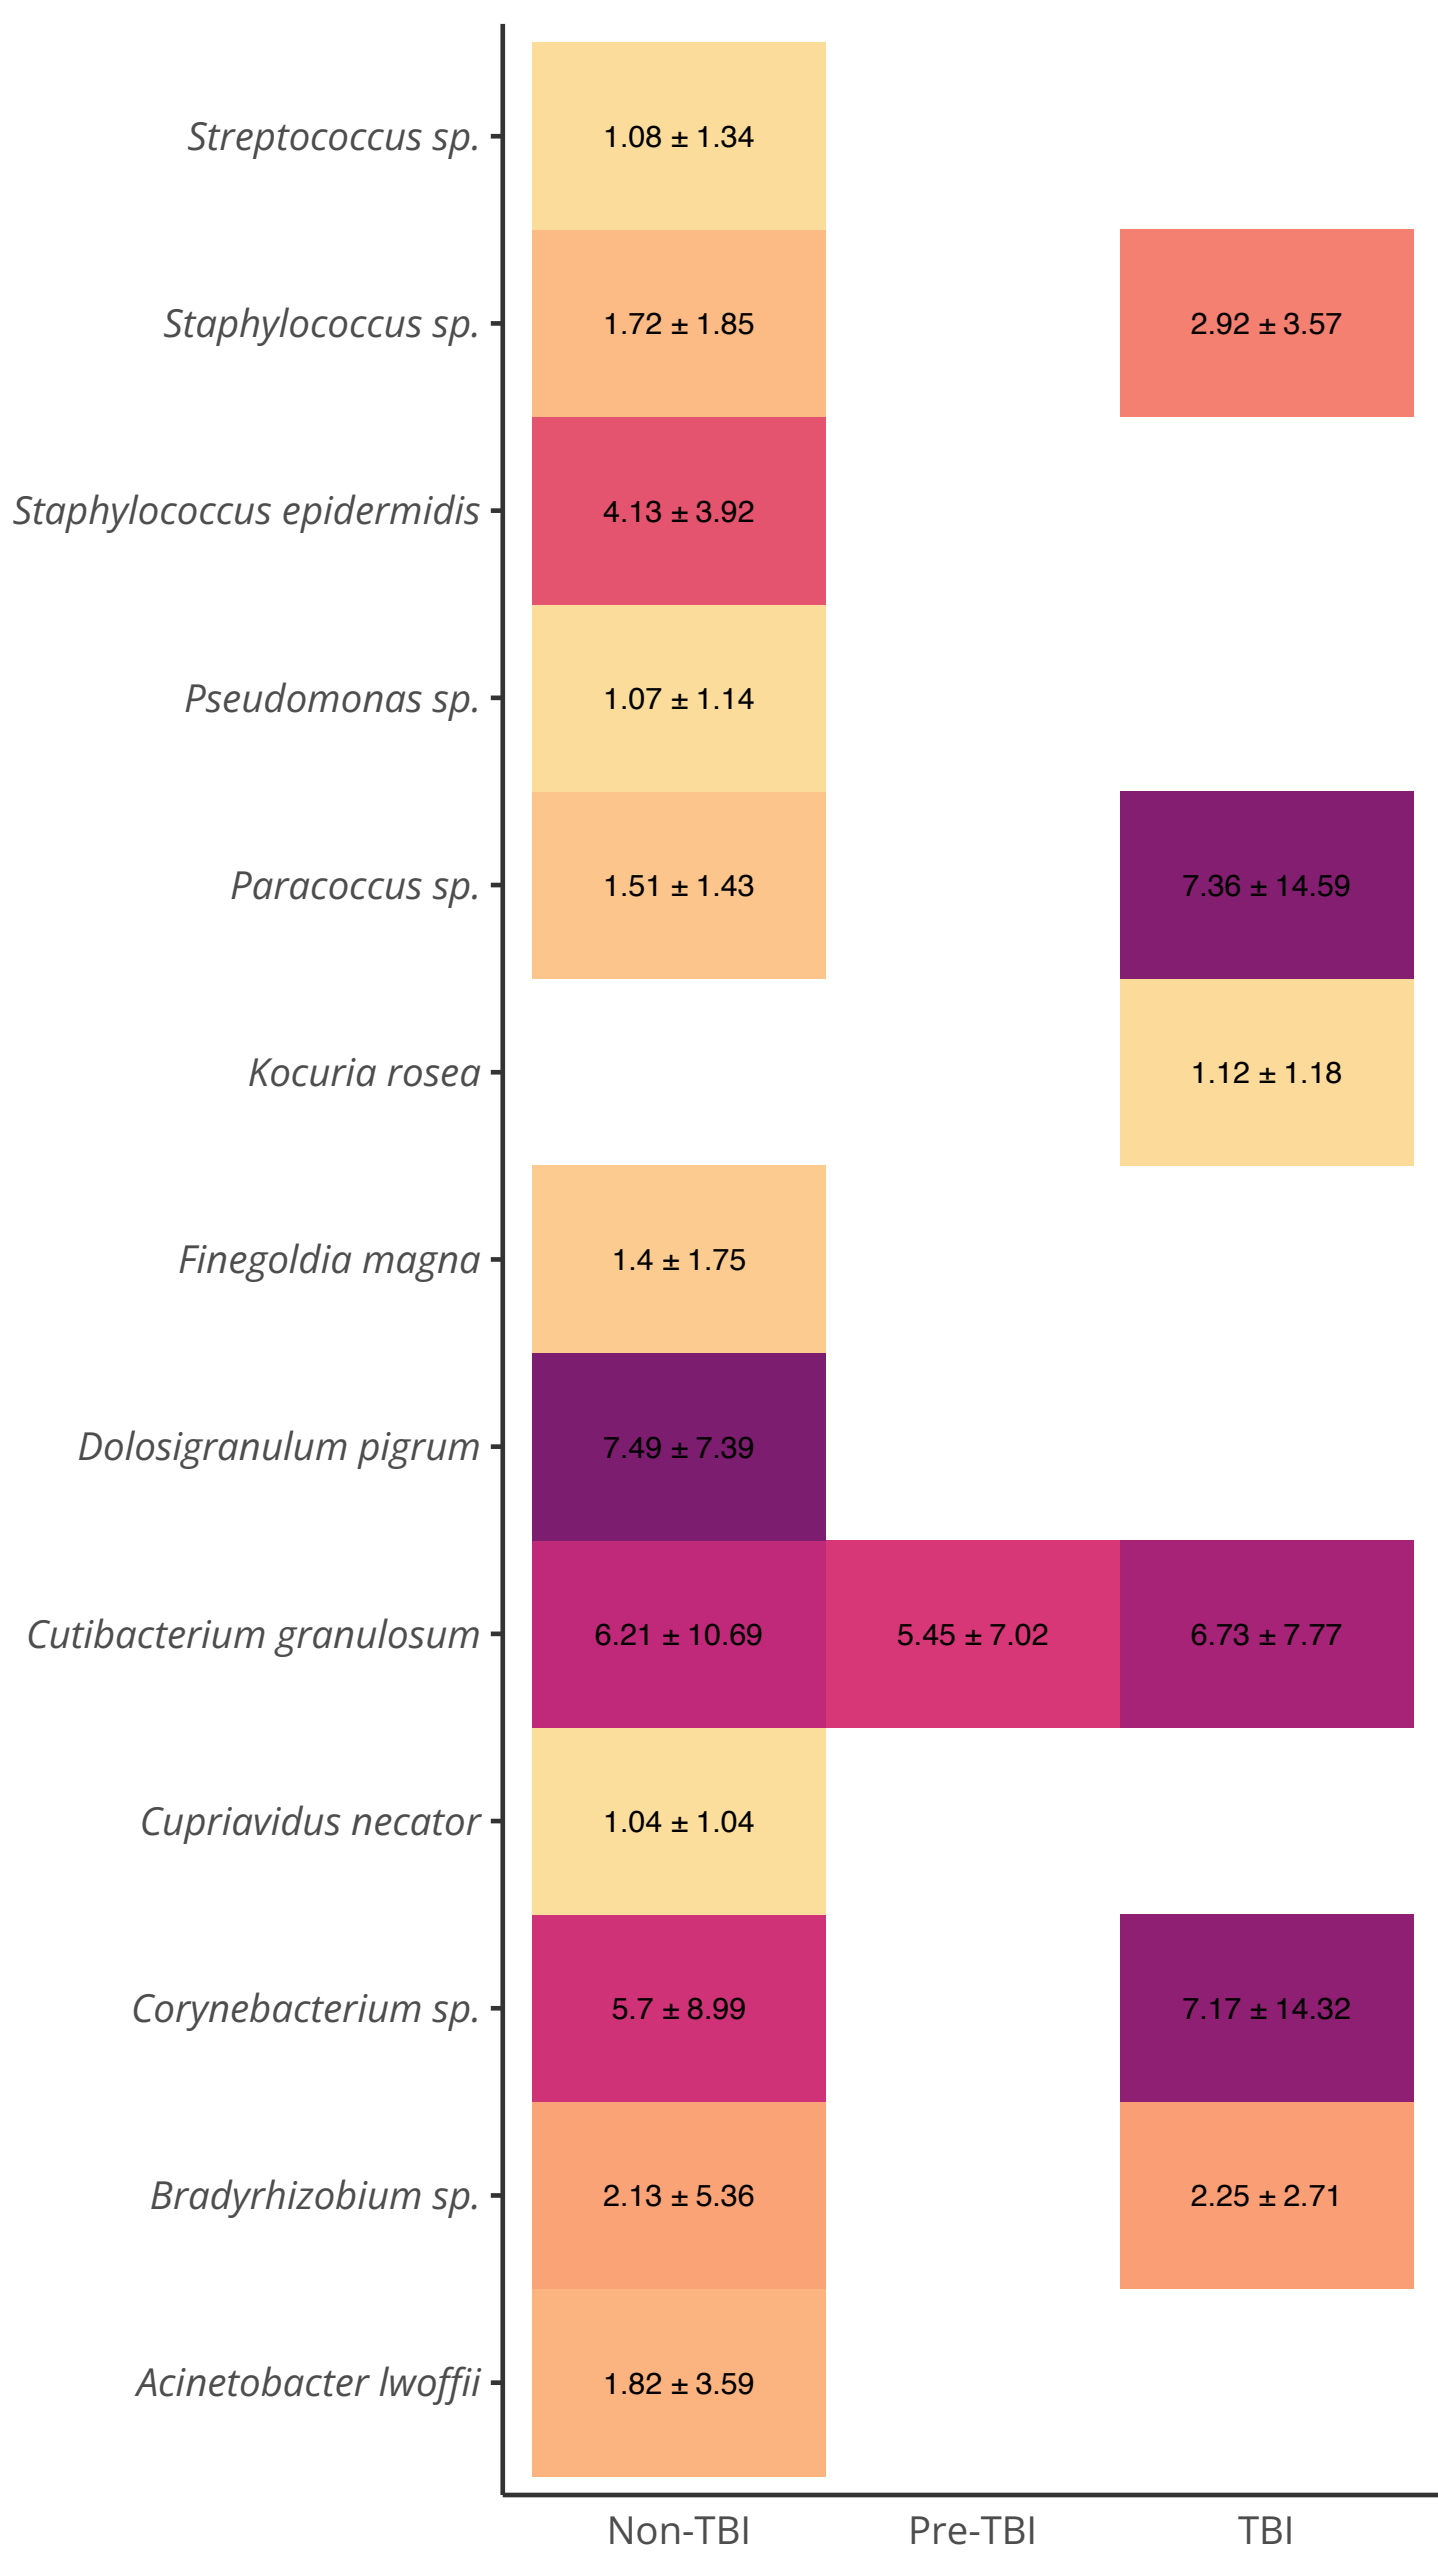

Average relative abundance (%)

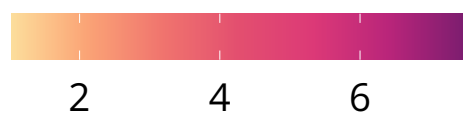

Supplement: 41598_2023_34052_MOESM3_ESM.pdf [file 41598_2023_34052_MOESM3_ESM.pdf]
